# Supplementary material for: Circulating Extracellular RNA Markers of Liver Regeneration
Source: PubMed Central journal article supplement (PMC4945050; doi:10.1371/journal.pone.0155888), 2016-07-14
Supplement: pone.0155888.s004.pdf [file pone.0155888.s004.pdf]

S1 Table: Comparison of output data

|                                 | Maverix | Mayo | Genboree |
|---------------------------------|---------|------|----------|
| Read count for mature miRNA     |         | ✓    | ✓        |
| Possible Novel miRNA            |         | ✓    | ✓        |
| Differential expressed miRNAs   | ✓       |      |          |
| Variants in miRNAs              |         | ✓    |          |
| Individual Read Mapping Details |         |      | ✓        |
| Exogenous miRNA                 |         |      | ✓        |
| Ready for IGV view              | ✓       | ✓    |          |
