# Supplementary material for: Circulating Extracellular RNA Markers of Liver Regeneration
Source: PubMed Central journal article supplement (PMC4945050; doi:10.1371/journal.pone.0155888), 2016-07-14
Supplement: pone.0155888.s005.pdf [file pone.0155888.s005.pdf]

Supplementary Table 2

| targets      | description                                            | UniProt |
|--------------|--------------------------------------------------------|---------|
| NM_001001182 | bromodomain adjacent to zinc finger domain, 2B         | Q8CFP4  |
| NM_001001309 | integrin alpha 8 (Itga8), mRNA.                        | A2ARA8  |
| NM_001001321 | solute carrier family 35, member D2 (Slc35d2), mRNA.   | Q762D5  |
| NM_001003920 | BR serine/threonine kinase 1 (Brsk1), mRNA.            | Q5RJI5  |
| NM_001004468 | transforming, acidic coiled-coil containing protein 2  | Q9JJG0  |
| NM_001005508 | Rho GTPase activating protein 30 (Arhgap30), mRNA.     | Q640N3  |
| NM_001008785 | kelch repeat and BTB (POZ) domain containing 8         | Q3UQV5  |
| NM_001013022 | outer dense fiber of sperm tails 3B (Odf3b), mRNA.     | Q5M8M2  |
| NM_001013609 | testis expressed gene 24 (Tex24), mRNA.                | Q5DP50  |
| NM_001015681 | RIKEN cDNA E130308A19 gene (E130308A19Rik), transcript | Q8C4P0  |
| NM_001017426 | KDM1 lysine (K)-specific demethylase 6B (Kdm6b), mRNA. | Q8K0Z1  |
| NM_001024945 | quiescin Q6 sulfhydryl oxidase 1 (Qsox1), transcript   | Q8BND5  |
| NM_001025296 | DNA fragmentation factor, alpha subunit (Dffa),        | Q8CA98  |
| NM_001029983 | mannosidase, alpha, class 1B, member 1 (Man1b1), mRNA. | Q923C1  |
| NM_001033269 | eukaryotic translation initiation factor 4E family     | -       |
| NM_001033536 | regulatory factor X, 7 (Rfx7), mRNA.                   | Q8CB07  |
| NM_001034037 | RIKEN cDNA 1700024G13 gene (1700024G13Rik), mRNA.      | -       |
| NM_001034863 | transmembrane protein 136 (Tmem136), mRNA.             | Q3TYE7  |
| NM_001039088 | SEH1-like (S. cerevisiae (Seh1l), transcript variant   | Q8R2U0  |
| NM_001039644 | ER degradation enhancer, mannosidase alpha-like 3      | Q8R1X5  |
| NM_001042592 | arrestin domain containing 4 (Arrdc4), transcript      | Q9D6S6  |
| NM_001045536 | zinc finger, ZZ-type with EF hand domain 1 (Zzef1),    | Q5SSH7  |
| NM_001081048 | solute carrier family 25 (mitochondrial carrier),      | Q9DB41  |
| NM_001081088 | low density lipoprotein receptor-related protein 2     | Q3V346  |
| NM_001081152 | nuclear protein in the AT region (Npat), mRNA.         | Q8BPV1  |
| NM_001081205 | NIPA-like domain containing 1 (Nipal1), mRNA.          | Q8BMW7  |
| NM_001081206 | diacylglycerol kinase, iota (Dgki), mRNA.              | -       |
| NM_001081366 | vacuolar protein sorting 8 homolog (S. cerevisiae)     | Q8CIG5  |
| NM_001081417 | chromodomain helicase DNA binding protein 7 (Chd7),    | A2AJK6  |
| NM_001081433 | ankyrin repeat domain 44 (Ankrd44), mRNA.              | Q8BYT6  |
| NM_001099296 | glycine/arginine rich protein 1 (Grrp1), mRNA.         | Q80X91  |
| NM_001102455 | amyloid beta (A4) precursor-like protein 2 (Aplp2),    | Q9CYS4  |
| NM_001102456 | amyloid beta (A4) precursor-like protein 2 (Aplp2),    | -       |
| NM_001102670 | kelch repeat and BTB (POZ) domain containing 8         | -       |
| NM_001109661 | BTB and CNC homology 2 (Bach2), transcript variant 1,  | Q80WGO  |
| NM_001113180 | glutamate receptor, ionotropic, AMPA4 (alpha 4)        | Q9Z2W8  |
| NM_001136055 | CD82 antigen (Cd82), transcript variant 2, mRNA.       | Q3UII2  |
| NM_001139520 | SAM domain and HD domain, 1 (Samhd1), transcript       | Q8C5C0  |
| NM_001145948 | tetratricopeptide repeat domain 39A (Ttc39a),          | A2ACP1  |
| NM_001159769 | nuclear receptor subfamily 5, group A, member 2        | Q99N00  |
| NM_001159986 | SEC16 homolog B (S. cerevisiae) (Sec16b), transcript   | Q91XT4  |
| NM_001161406 | grainyhead-like 1 (Drosophila) (Grhl1), transcript     | Q921D9  |
| NM_001162946 | pyruvate carboxylase (Pcx), nuclear gene encoding      | Q8BP54  |
| NM_001163538 | phosphoglycerate mutase family member 5 (Pgam5),       | Q8BX10  |
| NM_001164074 | TGFB-induced factor homeobox 1 (Tgif1), transcript     | Q3TVD4  |
| NM_001164075 | TGFB-induced factor homeobox 1 (Tgif1), transcript     | -       |
| NM_001164076 | TGFB-induced factor homeobox 1 (Tgif1), transcript     | -       |
| NM_001164077 | TGFB-induced factor homeobox 1 (Tgif1), transcript     | -       |
| NM_001164249 | tropomyosin 1, alpha (Tpm1), transcript variant 2,     | -       |
| NM_001164250 | tropomyosin 1, alpha (Tpm1), transcript variant 4,     | -       |
| NM_001164252 | tropomyosin 1, alpha (Tpm1), transcript variant 6,     | -       |
| NM_001164253 | tropomyosin 1, alpha (Tpm1), transcript variant 7,     | -       |

|              |                                                                    |        |
|--------------|--------------------------------------------------------------------|--------|
| NM_001164717 | -                                                                  | -      |
| NM_001165253 | -                                                                  | -      |
| NM_001166495 | -                                                                  | -      |
| NM_001167946 | -                                                                  | -      |
| NM_001170746 | -                                                                  | -      |
| NM_001170855 | -                                                                  | -      |
| NM_001177778 | -                                                                  | -      |
| NM_001190374 | -                                                                  | -      |
| NM_007399    | a disintegrin and metallopeptidase domain 10 (Adam10),             | Q6NZC0 |
| NM_007405    | adenylate cyclase 6 (Adcy6), mRNA.                                 | Q80U07 |
| NM_007489    | aryl hydrocarbon receptor nuclear translocator-like                | Q9WTL8 |
| NM_007578    | calcium channel, voltage-dependent, P/Q type, alpha 1A             | Q9R0P8 |
| NM_007594    | calumenin (Calu), transcript variant 1, mRNA.                      | Q8CCN9 |
| NM_007663    | cadherin 16 (Cdh16), mRNA.                                         | Q8C730 |
| NM_007729    | collagen, type XI, alpha 1 (Col11a1), mRNA.                        | Q9EQV1 |
| NM_007737    | collagen, type V, alpha 2 (Col5a2), mRNA.                          | Q8BNA3 |
| NM_008018    | SH3 and PX domains 2A (Sh3pxd2a), mRNA.                            | O89032 |
| NM_008143    | guanine nucleotide binding protein (G protein), beta               | P68040 |
| NM_008580    | mitogen-activated protein kinase kinase kinase 5                   | Q8CC79 |
| NM_008597    | matrix Gla protein (Mgp), mRNA.                                    | Q8VEK8 |
| NM_008606    | matrix metallopeptidase 11 (Mmp11), mRNA.                          | Q7TPW7 |
| NM_008695    | nidogen 2 (Nid2), mRNA.                                            | Q8R5G0 |
| NM_008702    | nemo like kinase (Nik), mRNA.                                      | Q5SYE6 |
| NM_008711    | noggin (Nog), mRNA.                                                | P97466 |
| NM_008822    | peroxisomal biogenesis factor 7 (Pex7), transcript                 | -      |
| NM_008913    | protein phosphatase 3, catalytic subunit, alpha                    | Q8C649 |
| NM_008937    | prospero-related homeobox 1 (Prox1), mRNA.                         | P48437 |
| NM_008967    | prostaglandin I receptor (IP) (Ptgir), mRNA.                       | Q8CC99 |
| NM_009009    | RAD21 homolog (S. pombe) (Rad21), mRNA.                            | Q810A8 |
| NM_009197    | solute carrier family 16 (monocarboxylic acid                      | Q8K3S7 |
| NM_009223    | stannin (Snn), mRNA.                                               | Q5M8P0 |
| NM_009330    | HNF1 homeobox B (Hnf1b), mRNA.                                     | Q5SS49 |
| NM_009372    | TGFB-induced factor homeobox 1 (Tgif1), transcript                 | -      |
| NM_009436    | testis-specific serine kinase 2 (Tssk2), mRNA.                     | Q6P8M9 |
| NM_009498    | vesicle-associated membrane protein 3 (Vamp3), mRNA.               | P63024 |
| NM_009520    | wingless related MMTV integration site 2b (Wnt2b),                 | Q544L3 |
| NM_009582    | mitogen-activated protein kinase kinase kinase 12                  | -      |
| NM_009594    | c-abl oncogene 1, receptor tyrosine kinase (Abl1),                 | -      |
| NM_009616    | a disintegrin and metallopeptidase domain 19 (meltrin              | Q80UF6 |
| NM_009691    | amyloid beta (A4) precursor-like protein 2 (Aplp2),                | -      |
| NM_009722    | ATPase, Ca <sup>++</sup> transporting, cardiac muscle, slow twitch | -      |
| NM_009747    | bradykinin receptor, beta 2 (Bdkrb2), mRNA.                        | P32299 |
| NM_009785    | calcium channel, voltage-dependent, alpha2/delta                   | Q9Z1L5 |
| NM_009821    | runt related transcription factor 1 (Runx1),                       | -      |
| NM_009847    | CD2-associated protein (Cd2ap), mRNA.                              | Q9JLQ0 |
| NM_009874    | cyclin-dependent kinase 7 (homolog of Xenopus MO15                 | Q8CAC4 |
| NM_010056    | distal-less homeobox 5 (Dlx5), transcript variant 1,               | Q810E0 |
| NM_010165    | eyes absent 2 homolog (Drosophila) (Eya2), mRNA.                   | Q811N8 |
| NM_010181    | fibrillin 2 (Fbn2), mRNA.                                          | Q61555 |
| NM_010449    | homeo box A1 (Hoxa1), mRNA.                                        | Q8BNI8 |
| NM_010469    | homeo box D4 (Hoxd4), mRNA.                                        | P10628 |
| NM_010477    | heat shock protein 1 (chaperonin) (Hspd1), nuclear                 | P63038 |
| NM_010513    | insulin-like growth factor I receptor (Igf1r), mRNA.               | Q60751 |
| NM_010577    | integrin alpha 5 (fibronectin receptor alpha) (Itga5),             | Q80YP5 |
| NM_010637    | Kruppel-like factor 4 (gut) (Klf4), mRNA.                          | Q60793 |

|           |                                                        |        |
|-----------|--------------------------------------------------------|--------|
| NM_010728 | lysyl oxidase (Lox), mRNA.                             | Q3UXV2 |
| NM_010752 | mitotic arrest deficient 1-like 1 (Mad11), mRNA.       | Q9WTX8 |
| NM_010799 | multiple inositol polyphosphate histidine phosphatase  | Q9Z2L6 |
| NM_010864 | myosin VA (Myo5a), mRNA.                               | Q99104 |
| NM_010942 | neuron specific gene family member 1 (Nsg1), mRNA.     | Q8C5M2 |
| NM_011122 | procollagen-lysine, 2-oxoglutarate 5-dioxygenase 1     | Q9R0E2 |
| NM_011204 | protein tyrosine phosphatase, non-receptor type 13     | Q8CGJ2 |
| NM_011242 | RAS, guanyl releasing protein 2 (Rasgrp2), mRNA.       | Q9QUG9 |
| NM_011256 | phosphatidylinositol transfer protein,                 | Q6ZPQ6 |
| NM_011322 | sodium channel, voltage-gated, type I, beta (Scn1b),   | Q8CEH0 |
| NM_011376 | single-minded homolog 1 (Drosophila) (Sim1), mRNA.     | Q61045 |
| NM_011510 | ATP-binding cassette, sub-family C (CFTR/MRP), member  | Q9Z2P2 |
| NM_011711 | formin-like 3 (Fmnl3), mRNA.                           | Q8K364 |
| NM_011810 | Fas apoptotic inhibitory molecule (Faim), transcript   | -      |
| NM_011816 | GTPase activating protein (SH3 domain) binding protein | -      |
| NM_011822 | phosphatidylinositol glycan anchor biosynthesis, class | Q9QYT7 |
| NM_011829 | inosine 5'-phosphate dehydrogenase 1 (Impdh1), mRNA.   | Q7TSG7 |
| NM_011892 | sarcoglycan, gamma (dystrophin-associated              | Q9EQ83 |
| NM_011900 | mannose-P-dolichol utilization defect 1 (Mpdu1), mRNA. | Q9R0Q9 |
| NM_011958 | origin recognition complex, subunit 4-like (S.         | Q9CZF7 |
| NM_011980 | zinc finger protein 146 (Zfp146), mRNA.                | Q8BQN6 |
| NM_011991 | COP9 (constitutive photomorphogenic) homolog, subunit  | Q8BX58 |
| NM_013490 | choline kinase alpha (Chka), transcript variant 1,     | -      |
| NM_013529 | glutamine fructose-6-phosphate transaminase 2 (Gfpt2), | Q9Z2Z9 |
| NM_013672 | trans-acting transcription factor 1 (Sp1), mRNA.       | Q89090 |
| NM_013673 | nuclear antigen Sp100 (Sp100), mRNA.                   | Q8C9H3 |
| NM_013683 | transporter 1, ATP-binding cassette, sub-family B      | -      |
| NM_013693 | tumor necrosis factor (Tnf), mRNA.                     | Q6TDG3 |
| NM_013780 | neuronal PAS domain protein 3 (Npas3), mRNA.           | Q9QZQ0 |
| NM_013853 | ATP-binding cassette, sub-family F (GCN20), member 2   | Q99LE6 |
| NM_013890 | F-box and WD-40 domain protein 2 (Fbxw2), transcript   | Q9QUH1 |
| NM_015734 | collagen, type V, alpha 1 (Col5a1), mRNA.              | Q88207 |
| NM_015760 | NADPH oxidase 4 (Nox4), mRNA.                          | Q9JHI8 |
| NM_015763 | lipin 1 (Lpin1), transcript variant 2, mRNA.           | -      |
| NM_015801 | patatin-like phospholipase domain containing 6         | -      |
| NM_016685 | cartilage oligomeric matrix protein (Comp), mRNA.      | Q9R0G6 |
| NM_016719 | growth factor receptor bound protein 14 (Grb14), mRNA. | Q9JLM9 |
| NM_016742 | cell division cycle 37 homolog (S. cerevisiae)         | Q61081 |
| NM_016866 | serine/threonine kinase 39, STE20/SPS1 homolog (yeast) | Q9Z1W9 |
| NM_016889 | insulinoma-associated 1 (Insm1), mRNA.                 | Q63ZV0 |
| NM_016892 | copper chaperone for superoxide dismutase (Ccs), mRNA. | Q9WU84 |
| NM_018748 | golgi autoantigen, golgin subfamily a, 4 (Golga4),     | Q91VW5 |
| NM_018805 | heparan sulfate (glucosamine) 3-O-sulfotransferase 3B1 | Q9QZS6 |
| NM_018871 | tyrosine 3-monooxygenase/tryptophan 5-monooxygenase    | Q3TP56 |
| NM_019549 | pleckstrin (Plek), mRNA.                               | Q9JHK5 |
| NM_020008 | C-type lectin domain family 7, member a (Clec7a),      | Q6QLQ4 |
| NM_020009 | mechanistic target of rapamycin (serine/threonine      | Q9JLN9 |
| NM_020050 | TMEM9 domain family, member B (Tmem9b), mRNA.          | Q9JJR8 |
| NM_020329 | dolichyl pyrophosphate phosphatase 1 (Dolpp1), mRNA.   | Q9JMF7 |
| NM_021310 | junction-mediating and regulatory protein (Jmy), mRNA. | Q9QXM1 |
| NM_021314 | transforming, acidic coiled-coil containing protein 2  | -      |
| NM_021427 | family with sequence similarity 181, member B          | Q80VF6 |
| NM_021513 | THAP domain containing 11 (Thap11), mRNA.              | Q9JJD0 |
| NM_021715 | carbohydrate (N-acetylglucosamine) sulfotransferase 7  | Q9EP78 |
| NM_022325 | cathepsin Z (Ctsz), mRNA.                              | Q9WUU7 |

|           |                                                                    |        |
|-----------|--------------------------------------------------------------------|--------|
| NM_024174 | mitochondrial ribosomal protein S23 (Mrps23), nuclear              | Q99LZ4 |
| NM_024241 | kinesin family member 24 (Kif24), mRNA.                            | Q6NWW5 |
| NM_024427 | tropomyosin 1, alpha (Tpm1), transcript variant 3,                 | -      |
| NM_024435 | neurotensin (Nts), mRNA.                                           | Q9D3P9 |
| NM_025280 | antigenic determinant of rec-A protein (Kin), mRNA.                | Q8K339 |
| NM_025335 | transmembrane protein 167 (Tmem167), mRNA.                         | Q9CR64 |
| NM_025379 | cytochrome c oxidase subunit VIIb (Cox7b), nuclear                 | -      |
| NM_025455 | coiled coil domain containing 28B (Ccdc28b), mRNA.                 | Q9D919 |
| NM_025605 | RIKEN cDNA 2400001E08 gene (2400001E08Rik), mRNA.                  | Q9CQ22 |
| NM_025617 | RIKEN cDNA 2210012G02 gene (2210012G02Rik), mRNA.                  | Q9D3C1 |
| NM_025699 | RIKEN cDNA 3230401D17 gene (3230401D17Rik), mRNA.                  | Q9D722 |
| NM_025705 | discoidin, CUB and LCCL domain containing 1 (Dcbld1),              | Q9D4J3 |
| NM_025905 | tetratricopeptide repeat domain 23 (Ttc23), mRNA.                  | Q8CHY7 |
| NM_025943 | DAZ interacting protein 1 (Dzip1), mRNA.                           | Q9CPS9 |
| NM_025961 | glycine amidinotransferase (L-arginine:glycine                     | Q9D964 |
| NM_025978 | tetratricopeptide repeat domain 14 (Ttc14), transcript             | Q9D5Y1 |
| NM_026178 | monocyte to macrophage differentiation-associated                  | Q9CQY7 |
| NM_026267 | NECAP endocytosis associated 1 (Necap1), mRNA.                     | Q9CR95 |
| NM_026386 | sorting nexin 2 (Snx2), mRNA.                                      | Q9CWK8 |
| NM_026408 | synuclein, alpha interacting protein (synphilin)                   | Q9D3Y6 |
| NM_026482 | ATPase, Ca <sup>++</sup> transporting, plasma membrane 1 (Atp2b1), | Q8K314 |
| NM_026622 | RIKEN cDNA 3110057O12 gene (3110057O12Rik), mRNA.                  | Q9CV37 |
| NM_026634 | RIKEN cDNA A930018P22 gene (A930018P22Rik), mRNA.                  | Q9D1Z2 |
| NM_026681 | coiled-coil domain containing 88C (Ccdc88c), mRNA.                 | Q9DCU8 |
| NM_026924 | ovo-like 2 (Drosophila) (Ovol2), transcript variant A,             | Q8CIV7 |
| NM_027156 | DEAD (Asp-Glu-Ala-Asp) box polypeptide 51 (Ddx51),                 | Q9D6S8 |
| NM_027439 | ATPase, H <sup>+</sup> transporting, lysosomal accessory protein 2 | Q9CYN9 |
| NM_027941 | leucine rich repeat containing 34 (Lrrc34), mRNA.                  | Q9DAM1 |
| NM_028762 | RNA binding motif protein 19 (Rbm19), mRNA.                        | Q8R3C6 |
| NM_028956 | pseudouridylate synthase 10 (Pus10), transcript                    | -      |
| NM_028975 | transmembrane protein 33 (Tmem33), transcript variant              | Q9CZM3 |
| NM_028979 | cytochrome P450, family 2, subfamily j, polypeptide 9              | Q9CRQ9 |
| NM_029083 | DNA-damage-inducible transcript 4 (Ddit4), mRNA.                   | Q9D3F7 |
| NM_029211 | ring finger protein 121 (Rnf121), mRNA.                            | Q8R1Z9 |
| NM_029794 | cleavage and polyadenylation specific factor 4-like                | -      |
| NM_029836 | TSPY-like 2 (Tspyl2), mRNA.                                        | Q7TQI8 |
| NM_029851 | dynein cytoplasmic 2 heavy chain 1 (Dync2h1), mRNA.                | Q45VK7 |
| NM_029868 | GC-rich promoter binding protein 1-like 1 (Gbp1l1),                | Q8BHT3 |
| NM_029939 | coiled-coil domain containing 151 (Ccdc151),                       | -      |
| NM_030035 | golgi autoantigen, golgin subfamily b, macrogolgin 1               | Q9CTU9 |
| NM_030676 | nuclear receptor subfamily 5, group A, member 2                    | -      |
| NM_033354 | SEC16 homolog B (S. cerevisiae) (Sec16b), transcript               | -      |
| NM_033601 | B-cell leukemia/lymphoma 3 (Bcl3), mRNA.                           | Q9Z2F6 |
| NM_053072 | FYVE, RhoGEF and PH domain containing 6 (Fgd6), mRNA.              | Q69ZL1 |
| NM_053074 | nucleoporin 62 (Nup62), mRNA.                                      | -      |
| NM_080456 | mitochondrial ribosomal protein S6 (Mrps6), nuclear                | Q3TLQ4 |
| NM_133208 | zinc finger protein 287 (Zfp287), mRNA.                            | Q9EQB9 |
| NM_133234 | BCL2 binding component 3 (Bbc3), mRNA.                             | Q99ML1 |
| NM_133668 | solute carrier family 25 (mitochondrial carrier,                   | Q8VEM8 |
| NM_133743 | Ly6/Plaur domain containing 3 (Lypd3), mRNA.                       | Q91YK8 |
| NM_133788 | isoprenylcysteine carboxyl methyltransferase (Icmt),               | Q9EQK7 |
| NM_133804 | transmembrane protein 132A (Tmem132a), mRNA.                       | Q922P8 |
| NM_133889 | BSD domain containing 1 (Bsd1), mRNA.                              | Q80Y55 |
| NM_134033 | coiled-coil domain containing 117 (Ccdc117), mRNA.                 | Q6PB51 |
| NM_134068 | dual specificity phosphatase 22 (Dusp22), transcript               | -      |

|           |                                                        |        |
|-----------|--------------------------------------------------------|--------|
| NM_134090 | KDEL (Lys-Asp-Glu-Leu) endoplasmic reticulum protein   | Q8R1L4 |
| NM_134117 | protein kinase domain containing, cytoplasmic (Pkdcc), | Q5RJI4 |
| NM_138673 | stabilin 2 (Stab2), mRNA.                              | Q8R4U0 |
| NM_144522 | TBC1 domain family, member 10b (Tbc1d10b), mRNA.       | Q8BHL3 |
| NM_144549 | tribbles homolog 1 (Drosophila) (Trib1), mRNA.         | Q8K4K4 |
| NM_144551 | tribbles homolog 2 (Drosophila) (Trib2), mRNA.         | Q8K4K3 |
| NM_144556 | leucine-rich repeat LGI family, member 4 (Lgi4), mRNA. | Q8K1S1 |
| NM_144856 | solute carrier family 22 (organic anion transporter),  | Q91WU2 |
| NM_145382 | family with sequence similarity 193, member B          | -      |
| NM_145833 | lin-28 homolog (C. elegans) (Lin28), mRNA.             | Q99MW2 |
| NM_145890 | grainyhead-like 1 (Drosophila) (Grhl1), transcript     | -      |
| NM_145933 | beta galactoside alpha 2,6 sialyltransferase 1         | Q9JJM6 |
| NM_145964 | cDNA sequence BC002199 (BC002199), mRNA.               | Q99LV9 |
| NM_145972 | cDNA sequence BC027231 (BC027231), mRNA.               | Q8R2U2 |
| NM_145997 | lysine (K)-specific demethylase 5A (Kdm5a), mRNA.      | Q921T5 |
| NM_146014 | cerebral cavernous malformation 2 homolog (human)      | Q8K2Y9 |
| NM_146067 | Vcalcineurin-like phosphoesterase domain containing 1  | Q8BFS6 |
| NM_146099 | DNA segment, Chr 19, Wayne State University 162,       | Q8BGW2 |
| NM_153178 | eukaryotic translation initiation factor 2C, 2         | Q8R3Q7 |
| NM_153194 | zinc finger protein 740 (Zfp740), mRNA.                | Q6NZQ6 |
| NM_153392 | tetratricopeptide repeat domain 39A (Ttc39a),          | -      |
| NM_153521 | leucine rich repeat containing 41 (Lrrc41), mRNA.      | Q8K1C9 |
| NM_153786 | vestigial like 2 homolog (Drosophila) (Vgll2), mRNA.   | Q8BGW8 |
| NM_153800 | Rho GTPase activating protein 22 (Arhgap22), mRNA.     | Q8BL80 |
| NM_170728 | ankyrin 3, epithelial (Ank3), transcript variant 1,    | -      |
| NM_172154 | ligand dependent nuclear receptor corepressor (Lcor),  | Q6ZPI3 |
| NM_172692 | glucosidase beta 2 (Gba2), mRNA.                       | Q69ZF3 |
| NM_172696 | InaD-like (Drosophila) (Inadl), transcript variant 1,  | -      |
| NM_172704 | DnaJ (Hsp40) homolog, subfamily C, member 11           | Q5U458 |
| NM_172726 | RIKEN cDNA E130309D02 gene (E130309D02Rik), mRNA.      | Q8BGA7 |
| NM_172748 | F-box and leucine-rich repeat protein 19 (Fbxl19),     | Q6PB97 |
| NM_172821 | mitogen-activated protein kinase kinase kinase 13      | -      |
| NM_172882 | WD repeat and FYVE domain containing 3 (Wdfy3), mRNA.  | Q8CHB9 |
| NM_172891 | serine/threonine/tyrosine kinase 1 (Styk1), mRNA.      | Q6J9G1 |
| NM_173350 | oxysterol binding protein-like 9 (Osbp19), transcript  | -      |
| NM_173391 | tryptophan hydroxylase 2 (Tph2), mRNA.                 | Q8CGV2 |
| NM_175271 | lysophosphatidic acid receptor 4 (Lpar4), mRNA.        | Q8BLG2 |
| NM_175312 | RIKEN cDNA B630005N14 gene (B630005N14Rik), mRNA.      | Q8BXX4 |
| NM_175358 | zinc finger, DHHC domain containing 15 (Zdhhc15),      | Q8BGJ0 |
| NM_175493 | G protein-coupled receptor 68 (Gpr68), mRNA.           | Q8BFQ3 |
| NM_175533 | RIKEN cDNA 5830411N06 gene (5830411N06Rik), transcript | -      |
| NM_175535 | Rho GTPase activating protein 20 (Arhgap20), mRNA.     | Q8R0E4 |
| NM_175638 | WNK lysine deficient protein kinase 4 (Wnk4), mRNA.    | Q8C1P8 |
| NM_177142 | lipase, member I (Lipi), mRNA.                         | Q8BVB7 |
| NM_177231 | arrestin, beta 1 (Arrb1), transcript variant a, mRNA.  | Q8BWG8 |
| NM_177660 | zinc finger and BTB domain containing 10 (Zbtb10),     | Q8BNK5 |
| NM_177663 | interferon stimulated exonuclease gene 20-like 2       | Q8BVS4 |
| NM_177755 | kelch-like 38 (Drosophila) (Kihl38), mRNA.             | -      |
| NM_177855 | mediator of RNA polymerase II transcription, subunit   | Q8BQM9 |
| NM_178683 | DEP domain containing 1B (Depdc1b), mRNA.              | Q8BH88 |
| NM_178685 | protocadherin 20 (Pcdh20), mRNA.                       | Q8R1A3 |
| NM_178692 | RIKEN cDNA C130074G19 gene (C130074G19Rik), mRNA.      | -      |
| NM_178706 | sialic acid binding Ig-like lectin H (Siglech), mRNA.  | Q4QQK7 |
| NM_178710 | salt inducible kinase 2 (Sik2), mRNA.                  | Q8CFH6 |
| NM_178802 | tripartite motif-containing 65 (Trim65), mRNA.         | Q8BJT1 |

|           |                                                        |        |
|-----------|--------------------------------------------------------|--------|
| NM_178912 | Fanconi anemia, complementation group M (Fancm), mRNA. | Q8CE63 |
| NM_178935 | RIKEN cDNA 4932441K18 gene (4932441K18Rik), mRNA.      | Q8BHN1 |
| NM_181040 | ATP synthase mitochondrial F1 complex assembly factor  | Q81110 |
| NM_181072 | myosin IE (Myo1e), mRNA.                               | Q91ZI4 |
| NM_181073 | pleckstrin homology domain containing, family H (with  | Q80TI1 |
| NM_181400 | WD repeat domain 47 (Wdr47), mRNA.                     | Q8CGF6 |
| NM_182839 | tubulin polymerization promoting protein (Tppp), mRNA. | Q7TQD2 |
| NM_183024 | ribonucleoprotein, PTB-binding 2 (Raver2), mRNA.       | -      |
| NM_183148 | intermediate filament family orphan 2 (Iffo2), mRNA.   | Q8R2V2 |
| NM_183162 | cDNA sequence BC006779 (BC006779), mRNA.               | Q922U3 |
| NM_183173 | ankyrin repeat domain 43 (Ankrd43), mRNA.              | Q8BLS7 |
| NM_183270 | coiled-coil-helix-coiled-coil-helix domain containing  | Q8BT51 |
| NM_184053 | calumenin (Calu), transcript variant 2, mRNA.          | -      |
| NM_194336 | macrophage activation 2 like (Mpa2l), mRNA.            | Q7TMV8 |
| NM_197945 | ProSAPiP1 protein (Prosapip1), mRNA.                   | Q6PE51 |
| NM_198007 | activating signal cointegrator 1 complex subunit 3     | -      |
| NM_198095 | bone marrow stromal cell antigen 2 (Bst2), mRNA.       | Q8R2Q8 |
| NM_198294 | tetratricopeptide repeat, ankyrin repeat and           | Q8CHA0 |
| NM_198415 | creatine kinase, mitochondrial 2 (Ckmt2), nuclear gene | Q6P8J7 |
| NM_198421 | ubiquitin specific peptidase 49 (Usp49), mRNA.         | Q9R0X0 |
| NM_198614 | family with sequence similarity 148, member C          | Q5HZI2 |
| NM_198644 | zinc finger and AT hook domain containing (Zfat),      | -      |
| NM_199056 | inositol 1,3,4,5,6-pentakisphosphate 2-kinase (lppk),  | Q6P1C1 |
| NM_199065 | SLIT and NTRK-like family, member 1 (Slitrk1), mRNA.   | Q810C1 |
| NM_199143 | zinc and ring finger 2 (Znrf2), mRNA.                  | Q71FD5 |
| NM_199322 | DOT1-like, histone H3 methyltransferase (S.            | Q6XZL8 |
| NM_201355 | N-acetyltransferase 14 (Nat14), mRNA.                  | Q8BVG8 |
| NM_206856 | transforming, acidic coiled-coil containing protein 2  | -      |
| NM_207204 | ninein-like (Ninl), mRNA.                              | Q6ZQ12 |
| NM_207213 | sorting nexin 25 (Snx25), mRNA.                        | Q7TQF4 |
| NM_207217 | integrin alpha FG-GAP repeat containing 3 (Itfg3),     | Q8C0Z1 |
| NM_207279 | phosphatidylinositol-specific phospholipase C, X       | Q8CHS4 |
| NR_028355 | steroid receptor RNA activator 1 (Sra1), transcript    | -      |
